# Supplementary material for: Neuropsychiatric Features of Fregoli Syndrome: An Individual Patient Meta-Analysis
Source: Atypon-hosted journal article supplement (doi:10.1176/appi.neuropsych.22010011), 2022-09-29
Supplement: appi.neuropsych.22010011.ds001.pdf [file appi.neuropsych.22010011.ds001.pdf]

## Supplementary Materials

### Neuropsychiatric Features of Fregoli Syndrome: An Individual Patient Meta-Analysis

#### Authors

Maria Teixeira-Dias

Amber Kaur Dadwal

Vaughan Bell

Graham Blackman ([graham.blackman@kcl.ac.uk](mailto:graham.blackman@kcl.ac.uk))

Supplementary Materials

|                                                                                                                                                         |           |
|---------------------------------------------------------------------------------------------------------------------------------------------------------|-----------|
| <b>A: Table S1. PRISMA Guidelines checklist .....</b>                                                                                                   | <b>3</b>  |
| <b>B: Figure S1. PRISMA flowchart diagram.....</b>                                                                                                      | <b>7</b>  |
| <b>C: Table S2. Adapted version of the Diagnosis Certainty scale from Bell et al. 2017.....</b>                                                         | <b>8</b>  |
| <b>D: Table S3. Methodological quality scale to assess cases' risk of bias Murad et al., 2018..</b>                                                     | <b>9</b>  |
| <b>E: Table S4: Frequencies of neuropsychiatric features in primary and secondary Fregoli syndromes.....</b>                                            | <b>10</b> |
| <b>F: Table S5. Secondary Analyses: Lesion locations - Unadjusted p-values .....</b>                                                                    | <b>11</b> |
| <b>G: Table S6. Secondary Analyses: Fregoli delusion content – Unadjusted p-values .....</b>                                                            | <b>12</b> |
| <b>H: Figure S2. Forest plot of the analysis of primary (n = 4) and secondary (n = 19) psychosis patients which reported neuroimaging results .....</b> | <b>13</b> |
| <b>I: Table S7. Cases of Fregoli syndrome included in the meta-analysis.....</b>                                                                        | <b>14</b> |
| <b>J: References of eligible cases of Fregoli syndrome .....</b>                                                                                        | <b>23</b> |
| i) Included in the meta-analysis.....                                                                                                                   | 23        |
| ii) Excluded from the meta-analysis: a due to mixed aetiology .....                                                                                     | 30        |
| iii) Excluded from the meta-analysis: b due to insufficient data reported.....                                                                          | 30        |

**A: Table S1. PRISMA Guidelines checklist**

| Section/topic             | # | Checklist item                                                                                                                                                                                                                                                                                              | Reported on page # |
|---------------------------|---|-------------------------------------------------------------------------------------------------------------------------------------------------------------------------------------------------------------------------------------------------------------------------------------------------------------|--------------------|
| <b>TITLE</b>              |   |                                                                                                                                                                                                                                                                                                             |                    |
| Title                     | 1 | Identify the report as a systematic review, meta-analysis, or both.                                                                                                                                                                                                                                         | 1                  |
| <b>ABSTRACT</b>           |   |                                                                                                                                                                                                                                                                                                             |                    |
| Structured summary        | 2 | Provide a structured summary including, as applicable: background; objectives; data sources; study eligibility criteria, participants, and interventions; study appraisal and synthesis methods; results; limitations; conclusions and implications of key findings; systematic review registration number. | 2                  |
| <b>INTRODUCTION</b>       |   |                                                                                                                                                                                                                                                                                                             |                    |
| Rationale                 | 3 | Describe the rationale for the review in the context of what is already known.                                                                                                                                                                                                                              | 3                  |
| Objectives                | 4 | Provide an explicit statement of questions being addressed with reference to participants, interventions, comparisons, outcomes, and study design PICOS .                                                                                                                                                   | 3                  |
| <b>METHODS</b>            |   |                                                                                                                                                                                                                                                                                                             |                    |
| Protocol and registration | 5 | Indicate if a review protocol exists, if and where it can be accessed e.g., Web address , and, if available, provide registration information including registration number.                                                                                                                                | 5                  |
| Eligibility criteria      | 6 | Specify study characteristics e.g., PICOS, length of follow-up and report characteristics e.g., years considered, language, publication status used as criteria for eligibility, giving rationale.                                                                                                          | 4                  |
| Information sources       | 7 | Describe all information sources e.g., databases with dates of coverage, contact with study authors to identify additional studies in the search and date last searched.                                                                                                                                    | 4                  |

| Section/topic                      | #  | Checklist item                                                                                                                                                                                                        | Reported on page # |
|------------------------------------|----|-----------------------------------------------------------------------------------------------------------------------------------------------------------------------------------------------------------------------|--------------------|
| Search                             | 8  | Present full electronic search strategy for at least one database, including any limits used, such that it could be repeated.                                                                                         | 4                  |
| Study selection                    | 9  | State the process for selecting studies i.e., screening, eligibility, included in systematic review, and, if applicable, included in the meta-analysis .                                                              | 4, 6               |
| Data collection process            | 10 | Describe method of data extraction from reports e.g., piloted forms, independently, in duplicate and any processes for obtaining and confirming data from investigators.                                              | 4 - 5              |
| Data items                         | 11 | List and define all variables for which data were sought e.g., PICOS, funding sources and any assumptions and simplifications made.                                                                                   | 4 - 5              |
| Risk of bias in individual studies | 12 | Describe methods used for assessing risk of bias of individual studies including specification of whether this was done at the study or outcome level , and how this information is to be used in any data synthesis. | 5                  |
| Summary measures                   | 13 | State the principal summary measures e.g., risk ratio, difference in means .                                                                                                                                          | 5                  |
| Synthesis of results               | 14 | Describe the methods of handling data and combining results of studies, if done, including measures of consistency e.g., $I^2$ for each meta-analysis.                                                                | 5                  |
| Risk of bias across studies        | 15 | Specify any assessment of risk of bias that may affect the cumulative evidence e.g., publication bias, selective reporting within studies .                                                                           | 4, Supp. Table 3   |
| Additional analyses                | 16 | Describe methods of additional analyses e.g., sensitivity or subgroup analyses, meta-regression , if done, indicating which were pre-specified.                                                                       | 5                  |
| <b>RESULTS</b>                     |    |                                                                                                                                                                                                                       |                    |
| Study selection                    | 17 | Give numbers of studies screened, assessed for eligibility, and included in the review, with reasons for exclusions at each stage, ideally with a flow diagram.                                                       | 6, Supp. Figure 1  |

| Section/topic                 | #  | Checklist item                                                                                                                                                                                      | Reported on page # |
|-------------------------------|----|-----------------------------------------------------------------------------------------------------------------------------------------------------------------------------------------------------|--------------------|
| Study characteristics         | 18 | For each study, present characteristics for which data were extracted e.g., study size, PICOS, follow-up period and provide the citations.                                                          | Supp. Table 4      |
| Risk of bias within studies   | 19 | Present data on risk of bias of each study and, if available, any outcome level assessment see item 12 .                                                                                            | 7, Supp. Table 4   |
| Results of individual studies | 20 | For all outcomes considered benefits or harms , present, for each study: a simple summary data for each intervention group b effect estimates and confidence intervals, ideally with a forest plot. | 7 - 8              |
| Synthesis of results          | 21 | Present results of each meta-analysis done, including confidence intervals and measures of consistency.                                                                                             | 7 Figure 2         |
| Risk of bias across studies   | 22 | Present results of any assessment of risk of bias across studies see Item 15 .                                                                                                                      | 7                  |
| Additional analysis           | 23 | Give results of additional analyses, if done e.g., sensitivity or subgroup analyses, meta-regression [see Item 16] .                                                                                | 7 - 9              |
| <b>DISCUSSION</b>             |    |                                                                                                                                                                                                     |                    |
| Summary of evidence           | 24 | Summarize the main findings including the strength of evidence for each main outcome; consider their relevance to key groups e.g., healthcare providers, users, and policy makers .                 | 10 - 11            |
| Limitations                   | 25 | Discuss limitations at study and outcome level e.g., risk of bias , and at review-level e.g., incomplete retrieval of identified research, reporting bias .                                         | 11 - 12            |
| Conclusions                   | 26 | Provide a general interpretation of the results in the context of other evidence, and implications for future research.                                                                             | 12                 |

| Section/topic | #  | Checklist item                                                                                                                            | Reported on page # |
|---------------|----|-------------------------------------------------------------------------------------------------------------------------------------------|--------------------|
| FUNDING       |    |                                                                                                                                           |                    |
| Funding       | 27 | Describe sources of funding for the systematic review and other support e.g., supply of data ; role of funders for the systematic review. | 13                 |

**B: Figure S1. PRISMA flowchart diagram**

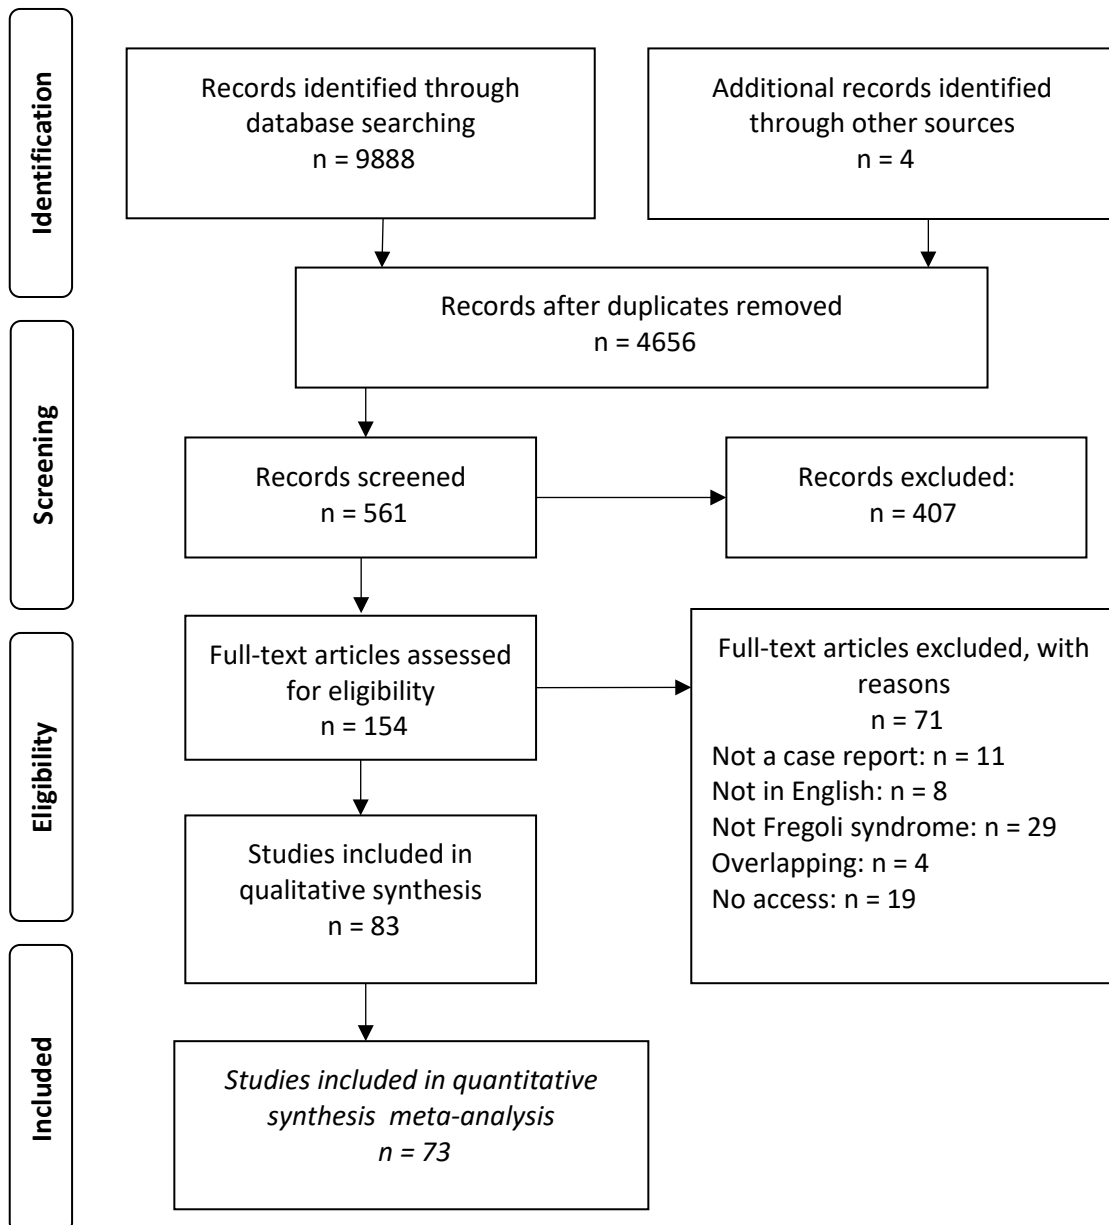

**C: Table S2. Adapted version of the Diagnosis Certainty scale from Bell et al. 2017**

| Category | Description                                                                                                                                                                                                                                                       |
|----------|-------------------------------------------------------------------------------------------------------------------------------------------------------------------------------------------------------------------------------------------------------------------|
| Strongly | Fregoli is mentioned as a present delusion plus evidence of present or recent relevant delusional misidentification of people is described mention of people being replaced, or impostors, or lookalikes, or identical looking people, or clones, or robots etc . |
| Possibly | Fregoli is mentioned as a present delusion but no additional description of delusion content is given, or delusional nature is questioned, or the description is clearly not person misidentification.                                                            |



**D: Table S3. Methodological quality scale to assess cases' risk of bias Murad et al., 2018**

| Domain                   | Question                                                                                                                                                                                               | Yes | No | x |
|--------------------------|--------------------------------------------------------------------------------------------------------------------------------------------------------------------------------------------------------|-----|----|---|
| Ascertainment            | Was the exposure adequately ascertained?<br>- 4 or more clinical features have been described<br>AND<br>- There is information on content of delusion<br>AND<br>- Cause of psychosis can be determined |     |    |   |
|                          | Was the outcome adequately ascertained?<br>- Description of treatment modality<br>AND<br>- Description of treatment response                                                                           |     |    |   |
|                          | Were other alternative causes that may explain the observation ruled out?<br>- Neuroimaging investigations must be mentioned (MRI, EEG or CT) AND<br>- Presence or not of abnormality must be clear    |     |    |   |
|                          | Was there a dose-response effect?<br>Was follow-up long enough for outcomes to occur?                                                                                                                  |     |    |   |
| Reporting                | Is the case described with sufficient details to allow other investigators to replicate the research or to allow practitioners make inferences related to their own practice?                          |     |    |   |
| <b>Total Score:</b>      |                                                                                                                                                                                                        | -   | -  | - |
| Note:                    |                                                                                                                                                                                                        |     |    |   |
| x = Cannot be determined |                                                                                                                                                                                                        |     |    |   |

**E: Table S4: Frequencies of neuropsychiatric features in primary and secondary Fregoli syndromes**

|                                      | Primary Psychosis Group (N = 34) |                | Secondary Psychosis Group (N = 55) |                | P-value |
|--------------------------------------|----------------------------------|----------------|------------------------------------|----------------|---------|
|                                      | N reported                       | Total reported | N reported                         | Total reported |         |
| <i>Investigation Findings</i>        |                                  |                |                                    |                |         |
| Neuroimaging (CT/MRI)                | 4                                | 21             | 19                                 | 23             | < .01   |
| Neurophysiological (EEG)             | 9                                | 22             | 5                                  | 10             | .63     |
| <i>Neuropsychiatric Domains</i>      |                                  |                |                                    |                |         |
| Cognitive Impairment                 | 21                               | 27             | 21                                 | 21             | .09     |
| Restlessness and Agitation           | 22                               | 23             | 14                                 | 16             | .37     |
| Depression and Anxiety               | 21                               | 23             | 6                                  | 9              | .11     |
| Thought Disorder                     | 20                               | 21             | 7                                  | 8              | .48     |
| Sleep Problems                       | 9                                | 12             | 2                                  | 2              | .71     |
| <i>Psychotic Features</i>            |                                  |                |                                    |                |         |
| Persecutory Features                 | 30                               | 53             | 8                                  | 32             | < .01   |
| Multiple Fregoli Delusions           | 34                               | 54             | 18                                 | 30             | .79     |
| Multiple Misidentification Delusions | 19                               | 51             | 7                                  | 22             | .66     |
| Co-occurring Delusions               | 42                               | 51             | 19                                 | 22             | .67     |
| First-Episode Psychosis              | 8                                | 30             | 12                                 | 15             | < .01   |
| Presence of Hallucinations           | 20                               | 24             | 11                                 | 13             | .92     |
| Lack of Insight                      | 21                               | 21             | 14                                 | 16             | .21     |
| <i>Response to Treatment</i>         |                                  |                |                                    |                |         |
| Antipsychotics Exclusively           | 15                               | 25             | 6                                  | 10             | 1.00    |
| Other Treatments                     | 10                               | 12             | 6                                  | 8              | .65     |

**F: Table S5. Secondary Analyses: Lesion locations - Unadjusted p-values**

| Lesion Locations | Total         |     | Primary<br>Psychosis<br>N = 4 |     | Secondary<br>Psychosis<br>N = 19 |     | p-<br>value |
|------------------|---------------|-----|-------------------------------|-----|----------------------------------|-----|-------------|
|                  | n<br>(N = 23) | %   | n<br>(N = 4)                  | %   | n<br>(N = 19)                    | %   |             |
| Right Side       | 15            | 65% | 1                             | 25% | 14                               | 74% | .09         |
| Bilateral        | 9             | 39% | 3                             | 75% | 6                                | 32% | .14         |
| Left Side        | 5             | 21% | 0                             | 0%  | 5                                | 26% | .43         |
| Frontal Lobe     | 12            | 52% | 2                             | 50% | 10                               | 53% | .92         |
| Temporal Lobe    | 5             | 21% | 3                             | 75% | 2                                | 11% | .02         |
| Temporoparietal  | 4             | 4%  | 0                             | 0%  | 4                                | 21% | .54         |
| Frontoparietal   | 3             | 13% | 0                             | 0%  | 3                                | 16% | .69         |

**G: Table S6. Secondary Analyses: Fregoli delusion content – Unadjusted p-values**

| Delusion Content                 | Total <sup>c</sup><br>(N = 86) |     | Primary<br>Psychosis<br>(N = 52) |     | Secondary<br>Psychosis<br>(N = 34) |     | p-value |
|----------------------------------|--------------------------------|-----|----------------------------------|-----|------------------------------------|-----|---------|
|                                  | n                              | %   | n                                | %   | n                                  | %   |         |
| <i>Person in the environment</i> |                                |     |                                  |     |                                    |     |         |
| Hospital members and police      | 43                             | 50% | 23                               | 44% | 20                                 | 59% | .19     |
| Strangers                        | 25                             | 29% | 19                               | 37% | 6                                  | 18% | .06     |
| Family members                   | 19                             | 22% | 11                               | 21% | 8                                  | 24% | .80     |
| Acquaintances <sup>a</sup>       | 10                             | 12% | 8                                | 15% | 2                                  | 6%  | .20     |
| TV characters                    | 3                              | 3%  | 2                                | 4%  | 1                                  | 3%  | .82     |
| <i>Identity perceived</i>        |                                |     |                                  |     |                                    |     |         |
| Family members                   | 36                             | 42% | 14                               | 27% | 22                                 | 65% | .0007   |
| Acquaintances <sup>a</sup>       | 25                             | 29% | 17                               | 33% | 8                                  | 24% | .36     |
| Romantic interest <sup>b</sup>   | 13                             | 15% | 10                               | 19% | 3                                  | 9%  | .20     |
| Famous people                    | 8                              | 9%  | 7                                | 13% | 1                                  | 3%  | .13     |
| Person related to trauma         | 4                              | 5%  | 3                                | 6%  | 1                                  | 3%  | .55     |

Note: <sup>a</sup> Acquaintances include neighbours, friends, school- and work-related people; <sup>b</sup> people with a romantic link also includes ex-partners; <sup>c</sup> Total number of cases that reported delusional content

**H: Figure S2. Forest plot of the analysis of primary (n = 4) and secondary (n = 19) psychosis patients which reported neuroimaging results**

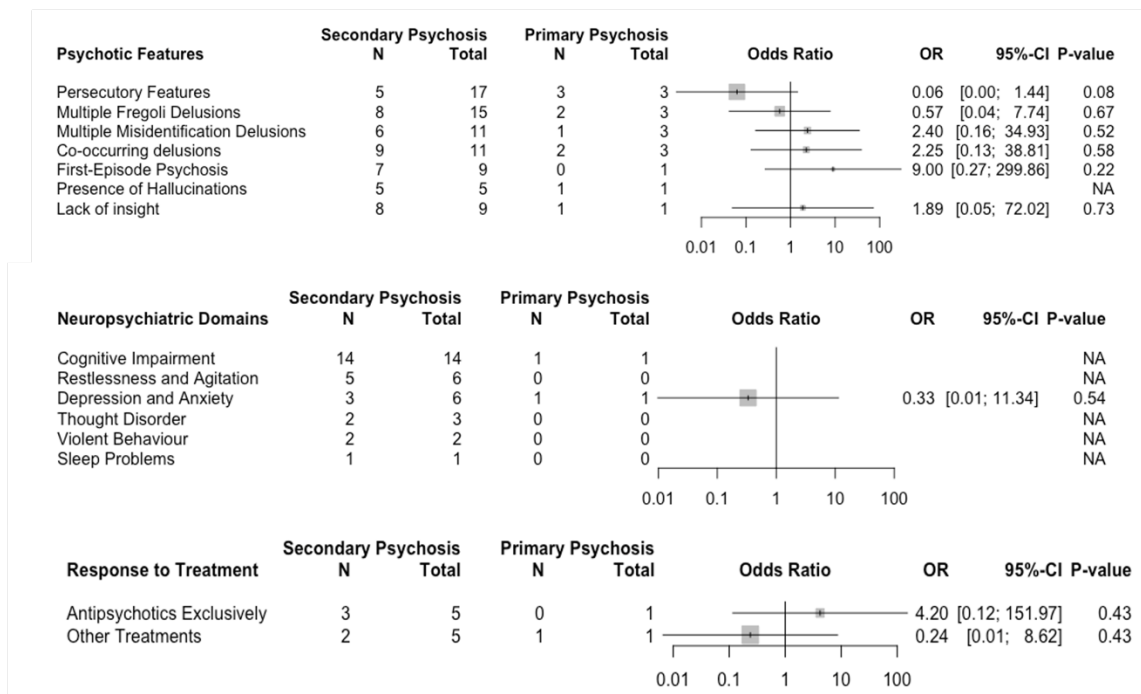

**I: Table S7. Cases of Fregoli syndrome included in the meta-analysis**

| Study                      | Type of article      | Country  | Patient's age | Patient's sex | Psychosis type | Cause of psychosis           | Diagnosis Coherence | Risk of Bias |
|----------------------------|----------------------|----------|---------------|---------------|----------------|------------------------------|---------------------|--------------|
| Abreu et al., 2019         | Case report          | Portugal | 52            | Male          | Primary        | Persistent Delusion Disorder | Strong              | 6            |
| Ashraf et al., 2011        | Case report          | USA      | 54            | Male          | Primary        | Schizophrenia                | Strong              | 4            |
| Atta et al., 2006          | Case series (Case 1) | Unclear  | 59            | Male          | Primary        | Bipolar Disorder             | Strong              | 0            |
| Atwal & Khan, 1987         | Case report          | USA      | 34            | Male          | Primary        | Schizophrenia                | Strong              | 2            |
| Banov et al., 1993         | Case report          | USA      | 65            | Female        | Primary        | Bipolar Disorder             | Possible            | 1            |
| Box et al., 1999           | Case report          | UK       | 27            | Female        | Secondary      | Traumatic Brain Injury       | Strong              | 5            |
| Brown et al., 1996         | Case report          | USA      | 29            | Female        | Primary        | Schizophrenia                | Strong              | 0            |
| Brüggemann & Garlipp, 2007 | Case report          | Germany  | 24            | Female        | Primary        | Schizophrenia                | Strong              | 3            |
| Carter et al., 1995        | Case report          | UK       | 75            | Male          | Primary        | Schizoaffective Disorder     | Strong              | 2            |
| Christodoulou, 1976        | Case Series          | Greece   |               |               |                |                              |                     |              |

| Study                    | Type of article      | Country | Patient's age | Patient's sex | Psychosis type | Cause of psychosis   | Diagnosis Coherence | Risk of Bias |
|--------------------------|----------------------|---------|---------------|---------------|----------------|----------------------|---------------------|--------------|
|                          | Case 1               | Greece  | 23            | Male          | Secondary      | Epilepsy             | Strong              | 3            |
|                          | Case 2               | Greece  | 27            | Male          | Primary        | Schizophrenia        | Strong              | 1            |
|                          | Case 3               | Greece  | 26            | Female        | Primary        | Schizophrenia        | Strong              | 3            |
|                          | Case 4               | Greece  | 33            | Male          | Secondary      | Systemic Illness     | Strong              | 3            |
|                          | Case 5               | Greece  | 20            | Male          | Primary        | Schizophrenia        | Strong              | 3            |
|                          | Case 6               | Greece  | 17            | Male          | Primary        | Schizophrenia        | Strong              | 3            |
|                          | Case 7               | Greece  | 20            | Male          | Primary        | Schizophrenia        | Strong              | 3            |
| Collacott & Napier, 1991 | Case report          | UK      | 42            | Female        | Primary        | Psychotic Depression | Strong              | 4            |
| De Bonis et al., 1994    | Case report          | France  | 20            | Male          | Primary        | Not specified        | Strong              | 1            |
| De Pauw & Szulecka, 1988 | Case series (Case 4) | UK      | 64            | Male          | Primary        | Schizophrenia        | Strong              | 2            |
| De Pauw et al., 1987     | Case report          | UK      | 66            | Female        | Secondary      | Stroke               | Strong              | 4            |

| Study                        | Type of article       | Country     | Patient's age | Patient's sex | Psychosis type | Cause of psychosis       | Diagnosis Coherence | Risk of Bias |
|------------------------------|-----------------------|-------------|---------------|---------------|----------------|--------------------------|---------------------|--------------|
| Delavenne & Garcia, 2011     | Case report           | France      | 30            | Female        | Primary        | Schizophrenia            | Strong              | 5            |
| Devine et al., 2011          | Abstract              | UK          | Not reported  | Not reported  | Secondary      | Stroke                   | Strong              | 1            |
|                              |                       |             | Not reported  | Not reported  | Secondary      | Stroke                   | Strong              | 1            |
| do céu Ferreira et al., 2017 | Case report           | Portugal    | 77            | Female        | Secondary      | Neurodegenerative        | Strong              | 5            |
| Duggal, 2004                 | Case report           | USA         | 30            | Female        | Secondary      | Epilepsy                 | Strong              | 4            |
| Edelstyn et al., 2003        | Experimental (Case 2) | UK          | 41            | Male          | Primary        | Schizophrenia            | Strong              | 1            |
| Eva & Perry, 1993            | Case report           | New Zealand | 19            | Male          | Secondary      | Substance-related        | Strong              | 5            |
| Evans et al., 1982           | Case report           | USA         | 34            | Female        | Primary        | Schizoaffective Disorder | Strong              | 2            |
| Feinberg, 2001               | Case series           | Unclear     |               |               |                |                          |                     |              |
|                              | Case 5                |             | 54            | Female        | Secondary      | Brain Tumour             | Strong              | 1            |



| Study                  | Type of article | Country | Patient's age | Patient's sex | Psychosis type | Cause of psychosis     | Diagnosis Coherence | Risk of Bias |
|------------------------|-----------------|---------|---------------|---------------|----------------|------------------------|---------------------|--------------|
|                        | Case 6          |         | Unclear       | Male          | Secondary      | Traumatic Brain Injury | Strong              | 1            |
| Feinberg et al., 2005  | Case report     | USA     | 41            | Male          | Secondary      | Stroke                 | Strong              | 1            |
| Feinberg et al., 1999  | Case report     | USA     | 61            | Male          | Secondary      | Traumatic Brain Injury | Strong              | 1            |
| Francis et al., 2004   | Case report     | UK      | 20            | Female        | Secondary      | Encephalitis           | Strong              | 0            |
| Granstein et al., 2015 | Case report     | Kuwait  | 15            | Male          | Secondary      | Traumatic Brain Injury | Strong              | 5            |
| Hermanowicz, 2018      | Case series     | USA     |               |               |                |                        |                     |              |
|                        | Case 1          |         | 84            | Female        | Secondary      | Neurodegenerative      | Strong              | 2            |
|                        | Case 2          |         | 79            | Male          | Secondary      | Neurodegenerative      | Strong              | 2            |
| Hintzen et al., 2010   | Case report     | Germany | 22            | Male          | Primary        | Schizophrenia          | Strong              | 1            |
| Hudson & Grace, 2000   | Case report     | Canada  | 71            | Female        | Secondary      | Systemic Illness       | Strong              | 2            |
| Jocic & Stanton, 1993  | Case report     | USA     | 67            | Male          | Secondary      | Stroke                 | Strong              | 2            |

| Study                       | Type of article | Country     | Patient's age | Patient's sex | Psychosis type | Cause of psychosis   | Diagnosis Coherence | Risk of Bias |
|-----------------------------|-----------------|-------------|---------------|---------------|----------------|----------------------|---------------------|--------------|
| Joseph, 1985                | Case report     | USA         | 23            | Male          | Primary        | Schizophrenia        | Possible            | 0            |
| Joseph, 1986                | Case series     | USA         |               |               |                |                      |                     |              |
|                             | Case 1          |             | 33            | Female        | Primary        | Schizophrenia        | Possible            | 1            |
|                             | Case 2          |             | 31            | Male          | Primary        | Schizophrenia        | Possible            | 1            |
| Kanzawa & Hadden, 2017      | Case report     | USA         | 23            | Male          | Primary        | Psychotic Depression | Strong              | 0            |
| Kochuparackal & Simon, 2012 | Case report     | Switzerland | 21            | Male          | Primary        | Schizophrenia        | Strong              | 1            |
| Kumar et al., 2018          | Case report     | India       | 43            | Female        | Primary        | Schizophrenia        | Strong              | 3            |
| Lantos, 1988                | Case report     | Canada      | 33            | Female        | Primary        | Psychotic Depression | Strong              | 1            |
| Lykouras et al., 2001       | Case report     | Greece      | 36            | Female        | Primary        | Schizophrenia        | Strong              | 3            |
| Lykouras et al., 2002       | Case report     | Greece      | 36            | Female        | Primary        | Schizophrenia        | Strong              | 6            |
| Mann & Foreman, 1996        | Case report     | UK          | 19            | Male          | Primary        | Schizophrenia        | Possible            | 5            |

| Study                        | Type of article      | Country | Patient's age | Patient's sex | Psychosis type | Cause of psychosis            | Diagnosis Coherence | Risk of Bias |
|------------------------------|----------------------|---------|---------------|---------------|----------------|-------------------------------|---------------------|--------------|
| Margariti & Kontaxakis, 2006 | Case series          | Greece  |               |               |                |                               |                     |              |
|                              | Case 1               |         | 19            | Female        | Primary        | Schizophrenia                 | Strong              | 3            |
|                              | Case 2               |         | 26            | Male          | Primary        | Schizophrenia                 | Possible            | 3            |
| McEvedy et al., 1996         | Case report          | UK      | 38            | Female        | Primary        | Bipolar Disorder              | Possible            | 4            |
| Melca et al., 2013           | Case series (Case 2) | Unclear | 30            | Male          | Primary        | Obsessive Compulsive Disorder | Possible            | 0            |
| Moriyama et al., 2007        | Case report          | Japan   | 68            | Female        | Secondary      | Stroke                        | Strong              | 5            |
| Mulholland & O'Hara, 1999    | Case report          | UK      | 44            | Male          | Primary        | Schizoaffective Disorder      | Strong              | 2            |
| Naguy & Al-Tajali, 2015      | Case report          | USA     | 40            | Female        | Primary        | Bipolar Disorder              | Strong              | 5            |
| Narayanaswamy et al., 2012   | Case Report          | India   | 40            | Female        | Primary        | Schizophrenia                 | Strong              | 4            |
| Nejad & Kheradmand, 2009     | Case report          | Iran    | 22            | Male          | Primary        | Bipolar Disorder              | Possible            | 6            |
| Nishio & Mori, 2012          | Case report          | Japan   | 69            | Male          | Secondary      | Stroke                        | Strong              | 2            |

| Study                   | Type of article | Country | Patient's age | Patient's sex | Psychosis type | Cause of psychosis               | Diagnosis Coherence | Risk of Bias |
|-------------------------|-----------------|---------|---------------|---------------|----------------|----------------------------------|---------------------|--------------|
| Novakovic et al., 2010  | Case report     | USA     | 45            | Female        | Primary        | Schizophrenia                    | Strong              | 2            |
| O'Sullivan & Dean, 1991 | Case series     | UK      |               |               |                |                                  |                     |              |
|                         | Case 1          |         | 23            | Female        | Primary        | Schizoaffective Disorder         | Strong              | 3            |
|                         | Case 2          |         | 30            | Female        | Primary        | Bipolar Disorder                 | Strong              | 3            |
|                         | Case 3          |         | 27            | Female        | Primary        | Unspecified Functional Psychosis | Strong              | 4            |
|                         | Case 4          |         | 28            | Female        | Primary        | Unspecified Functional Psychosis | Strong              | 4            |
| Oyebode et al., 1998    | Case series     | UK      |               |               |                |                                  |                     |              |
|                         | Case 2          |         | 43            | Male          | Primary        | Schizophrenia                    | Strong              | 0            |
|                         | Case 3          |         | 31            | Male          | Primary        | Schizophrenia                    | Strong              | 0            |
|                         | Case 4          |         | 37            | Female        | Primary        | Psychotic Depression             | Strong              | 0            |
| Ranjan et al., 2007     | Case report     | unclear | 25            | Female        | Primary        | Schizophrenia                    | Strong              | 3            |

| Study                     | Type of article      | Country | Patient's age | Patient's sex | Psychosis type | Cause of psychosis     | Diagnosis Coherence | Risk of Bias |
|---------------------------|----------------------|---------|---------------|---------------|----------------|------------------------|---------------------|--------------|
| Rodrigues & Banzato, 2006 | Case report          | Brazil  | 22            | Male          | Secondary      | Substance-related      | Strong              | 4            |
| Ruff & Volpe, 1981        | Case report          | USA     | 60            | Female        | Secondary      | Traumatic Brain Injury | Strong              | 1            |
| Sakurai et al., 2012      | Case report          | Japan   | 60            | Female        | Secondary      | Epilepsy               | Strong              | 5            |
| Salviati et al., 2014     | Case report          | Italy   | 61            | Female        | Secondary      | Systemic Illness       | Strong              | 4            |
| Sami et al., 2015         | Case report          | UK      | 34            | Male          | Secondary      | Traumatic Brain Injury | Strong              | 4            |
| Sanati & Mojtabai, 1993   | Case report          | Unclear | 51            | Female        | Primary        | Psychotic Depression   | Strong              | 4            |
| Silva et al., 1997        | Case series (Case 3) | USA     | 40            | Male          | Primary        | Bipolar Disorder       | Possible            | 3            |
| Silva & Leong, 1992       | Case report          | USA     | 41            | Male          | Primary        | Schizophrenia          | Strong              | 2            |
| Silva et al., 1995        | Case series (Case 1) | USA     | 34            | Male          | Primary        | Schizophrenia          | Strong              | 3            |
| Silva et al., 1992        | Case series (Case 2) | USA     | 43            | Male          | Primary        | Schizophrenia          | Strong              | 1            |
| Singh et al., 2014        | Case report          | India   | 23            | Female        | Secondary      | Systemic Illness       | Strong              | 4            |

| Study                   | Type of article       | Country     | Patient's age | Patient's sex | Psychosis type | Cause of psychosis     | Diagnosis Coherence | Risk of Bias |
|-------------------------|-----------------------|-------------|---------------|---------------|----------------|------------------------|---------------------|--------------|
| Stewart, 2008           | Case report           | USA         | 57            | Male          | Secondary      | Substance-related      | Strong              | 2            |
| Tanabe et al., 2018     | Case report           | Japan       | 61            | Male          | Secondary      | Stroke                 | Strong              | 1            |
| Teo et al., 2017        | Case report           | Singapore   | 41            | Female        | Primary        | Folie à Deux           | Strong              | 3            |
| Turkiewicz et al., 2009 | Case report           | Brazil      | 62            | Female        | Secondary      | Neurodegenerative      | Strong              | 1            |
| Uga & Ibilah, 2019      | Abstract              | USA         | 67            | Female        | Secondary      | Neurodegenerative      | Strong              | 1            |
| Ulzen, 1995             | Case report           | Canada      | 50            | Male          | Secondary      | Traumatic Brain Injury | Strong              | 1            |
| Vecellio et al., 2003   | Case series (Case 2)  | Switzerland | 23            | Female        | Secondary      | Substance-related      | Strong              | 2            |
| Wright et al., 1993     | Case report           | UK          | 35            | Female        | Primary        | Schizophrenia          | Strong              | 2            |
| Yalin et al., 2008      | Case report           | Turkey      | 14            | Female        | Primary        | Not specified          | Strong              | 4            |
| Young et al., 1991      | Experimental (Case 1) | UK          | 67            | Male          | Secondary      | Stroke                 | Strong              | 0            |

### **J: References of eligible cases of Fregoli syndrome**

i) Included in the meta-analysis

- Abreu, T., Oliveira, G., & von Doellinger, O. (2019). A case of comorbid Capgras and Fregoli syndromes. *Actas Espanolas de Psiquiatria*, 47(5), 202–208.
- Arturo Silva, J., Ferrari, M. M., Leong, G. B., & Weinstock, R. (1997). The Role of Mania in the Genesis of Dangerous Delusional Misidentification. *Journal of Forensic Sciences*, 42(4), 670–674. <https://doi.org/10.1520/jfs14179j>
- Ashraf, N., Antonius, D., Sinkman, A., Kleinhaus, K., & Malaspina, D. (2011). Fregoli Syndrome: An Underrecognized Risk Factor for Aggression in Treatment Settings. *Case Reports in Psychiatry*, 2011, 1–3. <https://doi.org/10.1155/2011/351824>
- Atta, K., Forlenza, N., Gujski, M., Hashmi, S., & Isaac, G. (2006). Delusional Misidentification Syndromes: Separate Disorders or Unusual Presentations of Existing DSM-IV Categories? *Psychiatry*, 3(9), 56–61. <http://www.ncbi.nlm.nih.gov/pubmed/20975828><http://www.pubmedcentral.nih.gov/articlerender.fcgi?artid=PMC2963468>
- Atwal, S., & Khan, M. H. (1987). Coexistence of capgras and its related syndromes in a single patient. *Australian and New Zealand Journal of Psychiatry*, 20(4), 496–498. <https://doi.org/10.3109/00048678609158903>
- Banov, M. D., Kulickm, A. R., Oepen, G., & Pope, H. G. J. (1993). A new identity for misidentification syndromes. *The British Journal of Psychiatry*, 34(6), 414–417.
- Box, O., Laing, H., & Kopelman, M. (1999). The evolution of spontaneous confabulation, delusional misidentification and a related delusion in a case of severe head injury. *Neurocase*, 5(3), 251–262. <https://doi.org/10.1080/13554799908402730>
- Brown, E. S., Thompson, R., & Suppes, T. (1996). Capgras' and Fregoli's syndromes in one family. *The Journal of Clinical Psychiatry*, 57(3), 137–138.
- Brüggemann, B. R., & Garlipp, P. (2007). A special coincidence of erotomania and Fregoli syndrome. *Psychopathology*, 40(6), 468. <https://doi.org/10.1159/000108127>
- Carter, S., Prest, L. A., Bologna, S. M., Camp, C. J., Kay, P. A., Yurkow, J., Forman, L. J., Chopra, A., Cavalieri, T., Yeh, T., Liao, I., Yang, Y., Ko, H., Chang, C., & Lu, F. (1995). A case of Erotomania and the Fregoli syndrome. *Clinical Gerontologist*, 15(3), 45–48. <https://doi.org/10.1300/J018v15n03>
- Christodoulou, G. N. (1976). Delusional hyper-identifications of the Fregoli type. Organic pathogenetic contributors. *Acta Psychiatrica Scandinavica*, 54(5), 305–314.
- Collacott, R. A., & Napier, E. M. (1991). Erotomania and Fregoli-like state in Down's

- syndrome: dynamic and developmental aspects. *Journal of Intellectual Disability Research*, 35(5), 481–486. <https://doi.org/10.1111/j.1365-2788.1991.tb00431.x>
- De Bonis, M., De Boeck, P., Lida-Pulik, H., Bazin, N., Masure, M. C., & Féline, A. (1994). Person identification and self-concept in the delusional misidentification syndrome: A case study. *Psychopathology*, 27(1–2), 48–57. <https://doi.org/10.1159/000284848>
- De Pauw, K. W., & Szulecka, T. K. (1988). Dangerous delusions: violence and the misidentification syndromes. *The British Journal of Psychiatry*, 152(1), 91–96. <https://doi.org/10.1192/bjp.152.6.859b>
- De Pauw, K. W., Szulecka, T. K., & Poltock, T. L. (1987). Fregoli syndrome after cerebral infarction. *Journal of Nervous & Mental Disease*, 175(7), 433–438.
- Delavenne, H., & Garcia, F. D. (2011). Fregoli syndrome associated with violent behavior. *Jornal Brasileiro de Psiquiatria*, 60(1), 71–72. <https://doi.org/10.1590/S0047-20852011000100014>
- Devine, M., Bentley, P., Jones, B., Jenkins, H., & Malhotra, P. (2011). Persistent Psychosis in three susceptible individuals with right inferior frontal lobe stroke (Abstract). *European Journal of Neurology*, 18(Suppl 2), 420.
- do céu Ferreira, M., Costa, A. S., Santos, B., & Machado. (2017). Fregoli delusion in association with vascular dementia and hemodialysis: A case report. *European Journal of Psychiatry*, 31(1), 42–44. <https://doi.org/10.1016/j.ejpsy.2016.12.005>
- Duggal, H. S. (2004). Interictal psychosis presenting with fregoli syndrome. *Journal of Neuropsychiatry and Clinical Neurosciences*, 16(4), 543–544. <https://doi.org/10.1176/jnp.16.4.543>
- Edelstyn, N. M. J., Drakeford, J., Oyebode, F., & Findlay, C. (2003). Investigation of Conscious Recollection, False Recognition and Delusional Misidentification in Patients with Schizophrenia. *Psychopathology*, 36(6), 312–319. <https://doi.org/10.1159/000075831>
- Eva, F. J., & Perry, D. (1993). The Fregoli syndrome and cannabis delusional disorder. *Irish Journal of Psychological Medicine*, 10(2), 87–88. <https://doi.org/10.1017/S079096670001291X>
- Evans, D. L., Jeckel, L. L., & Slott, N. E. (1982). Erotomania: a variant of pathological mourning. *Bulletin of the Menninger Clinic*, 46(6), 507–520.
- Feinberg, T. E. (2001). Missing Pieces; Familiar Places. In *Altered egos: How the brain creates the self* (pp. 30–54). Oxford University Press.
- Feinberg, T. E., Deluca, J., Giacino, J. T., Roane, D. M., & Solms, M. (2005). Right-Hemisphere Pathology and the Self: Delusional Misidentification and Reduplication. In T. E. Feinberg & J. P. Keenan (Eds.), *The Lost Self: Pathologies of the Brain and*



- Identity (pp. 100–130). Oxford University Press.  
<https://doi.org/10.1093/acprof:oso/9780195173413.003.0008>
- Feinberg, T. E., Eaton, L. A., Roane, D. M., & Giacino, J. T. (1999). Multiple Fregoli delusions after traumatic brain injury. *Cortex*, 35(3), 373–387.  
[https://doi.org/10.1016/S0010-9452\(08\)70806-2](https://doi.org/10.1016/S0010-9452(08)70806-2)
- Francis, D. R., Riddoch, M. J., & Humphreys, G. W. (2004). On having royal relatives: Interpreting misidentifications in a case of impaired person recognition. *Cognitive Neuropsychology*, 21(5), 467–490. <https://doi.org/10.1080/02643290342000096>
- Granstein, J., Strimbu, K., Francois, D., & Kahn, D. A. (2015). An Unusual Case of Erotomania and Delusional Misidentification Syndrome. *Journal of Psychiatric Practice*, 21(4), 306–312. <https://doi.org/10.1097/PRA.0000000000000089>
- Hermanowicz, N. (2018). Delusional misidentification in Parkinson’s disease: report of two cases and a review. *Postgraduate Medicine*, 130(2), 280–283.  
<https://doi.org/10.1080/00325481.2018.1411161>
- Hintzen, A. K., Wilhelm-Gößling, C., & Garlipp, P. (2010). Combined delusional syndromes in a patient with schizophrenia: Erotomania, delusional misidentification syndrome, folie à deux and nihilistic delusion. *German Journal of Psychiatry*, 13(2), 96–99.
- Hudson, A. J., & Grace, G. M. (2000). Misidentification syndromes related to face specific area in the fusiform gyrus. *Journal of Neurology, Neurosurgery, and Psychiatry*, 69(5), 645–648. <https://doi.org/10.1136/jnnp.69.5.645>
- Jocic, Z., & Stanton, R. D. (1993). Reduplication after right middle cerebral artery infarction. *Brain and Cognition*, 23(2), 222–230.
- Joseph, A. B. (1985). Bitemporal atrophy in a patient with Fregoli syndrome, syndrome of Intermetamorphosis and Reduplicative Paramnesia. *American Journal of Psychiatry*, 142(1), 146–147.
- Joseph, A. B. (1986). Capgras Syndrome. *The British Journal of Psychiatry*, 148(6), 749–750.
- Kanzawa, M., & Hadden, O. (2017). Case report of a switch to mania induced by lurasidone. *Therapeutic Advances in Psychopharmacology*, 7(2), 91–93.  
<https://doi.org/10.1177/2045125316677954>
- Kochuparackal, T., & Simon, A. E. (2012). A “contemporary” case of Frégoli syndrome. *The Primary Care Companion for CNS Disorders*, 14(1). <https://doi.org/10.1159/000277002>
- Kumar, P. N. S., Gopalakrishnan, A., & Williams, M. (2018). A case of Fregoli syndrome in schizophrenia. In *Asian journal of psychiatry* (Vol. 36, pp. 119–120).  
<https://doi.org/10.1016/j.ajp.2018.07.003>
- Lantos, V. (1988). On the “organicity” of paranoid syndromes. *Psychiatric Journal of the*

- University of Ottawa, 13(1), 32–35.
- Lykouras, L., Typaldou, M., Gournellis, R., Vaslamatzis, G., & Christodoulou, G.-N. (2002). Coexistence of Capgras and Frégoli syndromes in a single patient. Clinical, neuroimaging and neuropsychological findings. *European Psychiatry : The Journal of the Association of European Psychiatrists*, 17(4), 234–235. [https://doi.org/10.1016/s0924-9338\(02\)00660-0](https://doi.org/10.1016/s0924-9338(02)00660-0)
- Lykouras, L., Lefteris, G., Gournellis, R., & Angelopoulos, E. (2001). Manic symptoms induced by olanzapine. *European Neuropsychopharmacology*, 11(2), 97–98.
- Mann, J., & Foreman, D. M. (1996). Homo-erotomania for a delusional parent: Erotomania with Capgras and Fregoli syndromes in a young male with learning difficulties. *Journal of Intellectual Disability Research*, 40(3), 275–278. <https://doi.org/10.1111/j.1365-2788.1996.tb00630.x>
- Margariti, M. M., & Kontaxakis, V. P. (2006). Approaching delusional misidentification syndromes as a disorder of the sense of uniqueness. *Psychopathology*, 39(6), 261–268. <https://doi.org/10.1159/000095730>
- McEvedy, C. J. B., Hendry, J., & Barnes, T. R. E. (1996). Delusional Misidentification: The Illusion of Fregoli and a Dog. *Psychopathology*, 29(4), 215–217. <https://doi.org/10.1159/000284995>
- Melca, I. A., Rodrigues, C. L., Serra-Pinheiro, M. A., Pantelis, C., Velakoulis, D., Mendlowicz, M. V., & Fontenelle, L. F. (2013). Delusional misidentification syndromes in obsessive-compulsive disorder. *The Psychiatric Quarterly*, 84(2), 175–181. <https://doi.org/10.1007/s11126-012-9237-z>
- Moriyama, Y., Muramatsu, T., Kato, M., Mimura, M., Akiyama, T., & Kashima, H. (2007). Frégoli syndrome accompanied with prosopagnosia in a woman with a 40-year history of schizophrenia. *Keio Journal of Medicine*, 56(4), 130–134. <https://doi.org/10.2302/kjm.56.130>
- Mulholland, C., & O'Hara, A. G. (1999). An unusual case of delusional misidentification: "Delusional hermaphroditism." *Psychopathology*, 32(4), 220–224. <https://doi.org/10.1159/000029093>
- Naguy, A., & Al-Tajali, A. (2015). Low-dose clozapine for an adolescent with TBI-related fregoli delusions. *African Journal of Psychiatry (South Africa)*, 18(5). <https://doi.org/10.4172/2378-5756.1000306>
- Narayanaswamy, J. C., Gopinath, S., Rajkumar, R. P., Raman, R. P. B., & Math, S. B. (2012). Co-occurrence of Intermetamorphosis and Frégoli Syndrome in Schizophrenia: A Case Report. *The Primary Care Companion for CNS Disorders*, 14(2). <https://doi.org/10.4088/PCC.11101279>

- Nejad, A. G., & Kheradmand, A. (2009). Five rare psychiatric syndromes co-occurring together. *Neurosciences*, 14(1), 91–93.  
<https://doi.org/10.1001/archopht.1959.00940090147023>
- Nishio, Y., & Mori, E. (2012). Delusions of death in a patient with right hemisphere infarction. *Cognitive and Behavioral Neurology*, 25(4), 216–223.
- Novakovic, V., Aje, O., & Sher, L. (2010). A patient with the Fregoli syndrome: A case report and discussion of the relevant literature. *International Journal on Disability and Human Development*, 9(1), 81–83. <https://doi.org/10.1515/IJDHD.2010.012>
- O’Sullivan, D., & Dean, C. (1991). The Fregoli syndrome and puerperal psychosis. *British Journal of Psychiatry*, 159, 274–277. <https://doi.org/10.1192/bjp.159.2.274>
- Oyebode, F., Edelstyn, N. M. J., Humphreys, G. W., & Booker, E. (1998). Facial processing and the delusional misidentification syndromes. *Cognitive Neuropsychiatry*, 3(4), 299–314. <https://doi.org/10.1080/135468098396116>
- Ranjan, S., Chandra, P. S., Gupta, A. K., & Prabhu, S. (2007). Clonal pluralization of self, relatives and others. *Psychopathology*, 40(6), 465–467.  
<https://doi.org/10.1159/000108126>
- Rodrigues, A. C. T., & Banzato, C. E. M. (2006). Delusional misidentification syndrome: Why such nosologic challenge remains intractable. *Psychopathology*, 39(6), 296–302.  
<https://doi.org/10.1159/000095777>
- Ruff, R. L., & Volpe, B. T. (1981). Environmental reduplication associated with right frontal and parietal lobe injury. *Journal of Neurology Neurosurgery and Psychiatry*, 44(5), 382–386. <https://doi.org/10.1136/jnnp.44.5.382>
- Sakurai, K., Kurita, T., Shiga, T., & Takeda, Y. (2012). A patient who misidentified all surrounding persons as her family. *Epilepsy and Behavior*, 25(2), 162–165.  
<https://doi.org/10.1016/j.yebeh.2012.06.025>
- Salviati, M., Carlone, C., Provenzano, A., Valeriani, G., Melcore, C., Macri, F., Terlizzi, S., & Biondi, M. (2014). Fregoli syndrome in course of infection-related delirium. A case report. *Journal of Psychopathology*, 20(2), 180–185.
- Sami, M., Piggott, K., Coysh, C., & Fialho, A. (2015). Psychosis, psychedelic substance misuse and head injury: A case report and 23 year follow-up. *Brain Injury*, 29(11), 1383–1386. <https://doi.org/10.3109/02699052.2015.1046491>
- Sanati, M., & Mojtabai, R. (1993). Fregoli syndrome with a jealous theme. *Journal of Clinical Psychiatry*, 54(12), 490–491.
- Silva, J. A., & Leong, G. B. (1992). A case of Capgras-Fregoli syndrome. *Journal of Clinical Psychiatry*, 53(3), 67–68.
- Silva, J. A., Leong, G. B., & Ferrari, M. M. (1995). Delusional misidentification of health care

- professionals. *The Psychiatric Quarterly*, 66(1), 51–61.  
<https://doi.org/10.1007/bf02238715>
- Silva, J. A., Leong, G. B., & Weinstock, R. (1992). The dangerousness of persons with misidentification syndromes. *Bulletin of the American Academy of Psychiatry and the Law*, 20(1), 77–86.
- Singh, H., Thyloth, M., Ganjekar, S., & Gandhi, P. (2014). A case of Fregoli syndrome and Erotomania associated with anemia. *Journal of Mental Health and Human Behaviour*, 19(2), 83. <https://doi.org/10.4103/0971-8990.153716>
- Stewart, J. T. (2008). Frégoli syndrome associated with levodopa treatment. *Movement Disorders*, 23(2), 308–309. <https://doi.org/10.1002/mds.21843>
- Tanabe, M., Funayama, M., Narizuka, Y., Nakajima, A., Matsukawa, I., & Nakamura, T. (2018). Delusional misidentification of inanimate objects, persons, and places after a left orbitofrontal cortex injury. *Cortex*, 352–354.
- Teo, D. C. L., Abraham, A. M., & Peh, A. L. H. (2017). Folie a deux and Fregoli syndrome with greater severity in the “secondary” - A case report. *Asian Journal of Psychiatry*, 25, 254–255.
- Turkiewicz, G., Zanetti, M. V., Zung, S., & Cordeiro, Q. (2009). Coexistence of Capgras and Frégoli syndromes associated to frontotemporal volume reduction and cerebral white matter hyperintensities. *Revista de Psiquiatria Clinica*, 36(6), 240–247.  
<https://doi.org/10.1590/s0101-60832009000600004>
- Uga, A., & Ibilah, T. (2019). Hyperfamiliarity for Unknown Faces in a Patient with Lewy Body Dementia. *CNS Spectrums*, 24(1), 218.
- Ulzen, T. P. M. (1995). Capgras and Fregoli's syndrome, aggression and mental retardation: A report of two cases. *The Canadian Journal of Psychiatry*, 40(10), 636–639.
- Vecellio, M., Schopper, C., & Modestin, J. (2003). Neuropsychiatric consequences (atypical psychosis and complex-partial seizures) of ecstasy use: possible evidence for toxicity-vulnerability predictors and implications for preventative and clinical care. *Journal of Psychopharmacology*, 17(3), 342–345. <https://doi.org/10.1177/02698811030173018>
- Wright, S., Young, A. W., & Hellawell, D. J. (1993). Fregoli delusion and erotomania. *Journal of Neurology, Neurosurgery & Psychiatry*, 56(3), 322–323.  
<https://doi.org/10.11251/ojjsn1969.25.95>
- Yalin, Ş., Taş, F. V., & Güvenir, T. (2008). The coexistence of Capgras, Fregoli and Cotard's syndromes in an adolescent case. *Nöropsikiyatri Arşivi / Archives of Neuropsychiatry*, 45(4), 149–151.
- Young, A. W., Flude, B. M., & Ellis, A. W. (1991). Delusional misidentification incident in a right hemisphere stroke patient. *Behavioural Neurology*, 4(2), 81–87.

Data Supplement for Teixeira-Dias et al., Neuropsychiatric Features of Fregoli Syndrome: An Individual Patient Meta-Analysis, *J Neuropsychiatry Clin Neurosci* (doi: 10.1176/appi.neuropsych.22010011)

<https://doi.org/10.3233/BEN-1991-4204>

ii) Excluded from the meta-analysis: a due to mixed aetiology

- Cooper, S. A., & Collacott, R. A. (1996). Delusional misidentification syndromes in a woman with mild learning disabilities. *Irish Journal of Psychological Medicine*, 13(2), 70–72. <https://doi.org/10.1017/S0790966700002470>
- Silva, J. A., Ferrari, M. M., Leong, G. B., & Weinstock, R. (1997). The Role of Mania in the Genesis of Dangerous Delusional Misidentification. *Journal of Forensic Sciences*, 42(4), 670–674. <https://doi.org/10.1520/jfs14179j>
- Silva, J. A., & Leong, G. B. (1991). A case of “subjective” Frégoli syndrome. *Journal of Psychiatry & Neuroscience : JPN*, 16(2), 103–105.
- Paillère-Martinot, M. L., Dao-Castellana, M. H., Masure, M. C., Pillon, B., & Martinot, J. L. (1994). Delusional misidentification: A clinical, neuropsychological and brain imaging case study. *Psychopathology*, 27(3–5), 200–210. <https://doi.org/10.1159/000284870>
- Wolf, G., & McKenzie, K. (1994). Capgras, Fregoli and Cotard’s syndromes and Koro in folie a deux. 165(6), 842.

iii) Excluded from the meta-analysis: b due to insufficient data reported

- Altable, C. R., & Urrutia, A. R. (2004). Koro-misidentification syndrome in schizophrenia? A plea for clinical psychopathology. *Psychopathology*, 37(5), 249–252. <https://doi.org/10.1159/000080721>
- Christodoulou, G. N. (1978). Course and prognosis of the syndrome of doubles. *The Journal of Nervous and Mental Disease*, 166(1), 68–72.
- Fadhel, S. Ben, Ammar, H. Ben, Tounsi, A., Daoud, M., & Hechmi, Z. (2018). Fregoli syndrome over the course of schizoaffective disorder: Case report and review of the literature. *European Psychiatry*, 48(Suppl 1), S522.
- Kakegawa, Y., Isono, O., Hanada, K., & Nishikawa, T. (2020). Incidence and lesions causative of delusional misidentification syndrome after stroke. *Brain and Behavior*, 10(11), 1–10. <https://doi.org/10.1002/brb3.1829>
- Nakamura, N., Nakamura, M., Isono, O., Nasu, T., & Shikata, Y. (2017). He is Dr. M. and this is Dr. M’s arm: 5 patients with fregoli’s delusion and somatoparaphrenia associated with right brain-damaged stroke. *Journal of the Neurological Sciences*, 381(Suppl 1), 197–198. <https://doi.org/10.1016/j.jns.2017.08.565>
